# Supplementary material for: The aspect ratio effect on the cytotoxicity of inert nano-particles flips depending on particle thickness, and is one of the reasons for the literature inconsistency
Source: Royal Society of Chemistry journal article supplement (doi:10.1039/d2na00453d), 2022-01-01
Supplement: d2na00453d2.pdf [file d2na00453d2.pdf]

## The effect of aspect ratio on the physical cell-particle interactions flips depending on particle thickness, and is one of the reasons for the inconsistency in cytotoxicity literature

Yifat Brill-Karniely<sup>1,2\*†</sup>, Ouri Schwob<sup>1†</sup>, Ofra Benny<sup>1\*</sup>

<sup>1</sup>Institute for Drug Research, The School of Pharmacy, Faculty of Medicine, The Hebrew University of Jerusalem, Jerusalem, Israel, 9112001.

<sup>2</sup>Institute of Animal Science, Agricultural Research Organization (ARO), The Volcani Center, Bet-Dagan, Israel

†These authors contributed equally to this work.

\*To whom correspondence should be addressed:

Yifat Brill-Karniely: [yifat.brill@mail.huji.ac.il](mailto:yifat.brill@mail.huji.ac.il) ; Ofra Benny: [ofra.benny@mail.huji.ac.il](mailto:ofra.benny@mail.huji.ac.il)

### Supplementary material

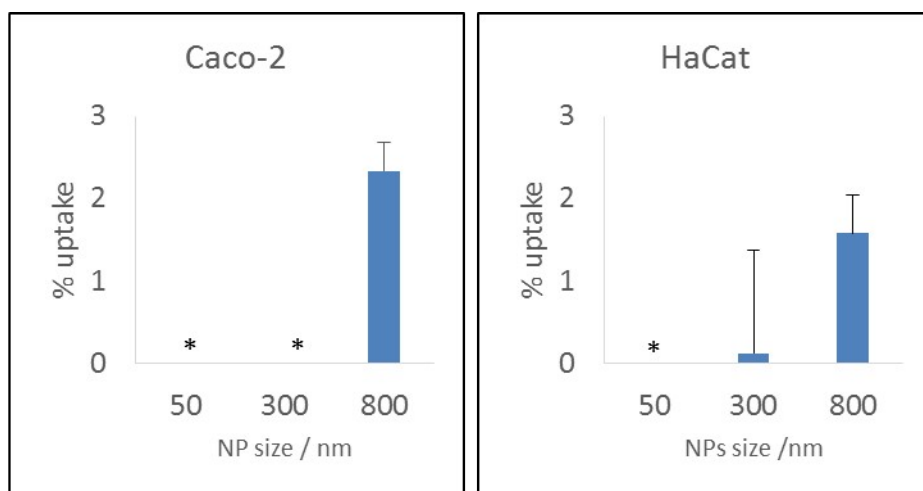

\* Below background

**Figure S1.** Polystyrene particles in a concentration of 5  $\mu\text{g}/\text{ml}$  that were incubated with the cells for 24 hour, showed a similar trend as shown in Figure 1, namely that smaller NPs are expected to be less toxic.

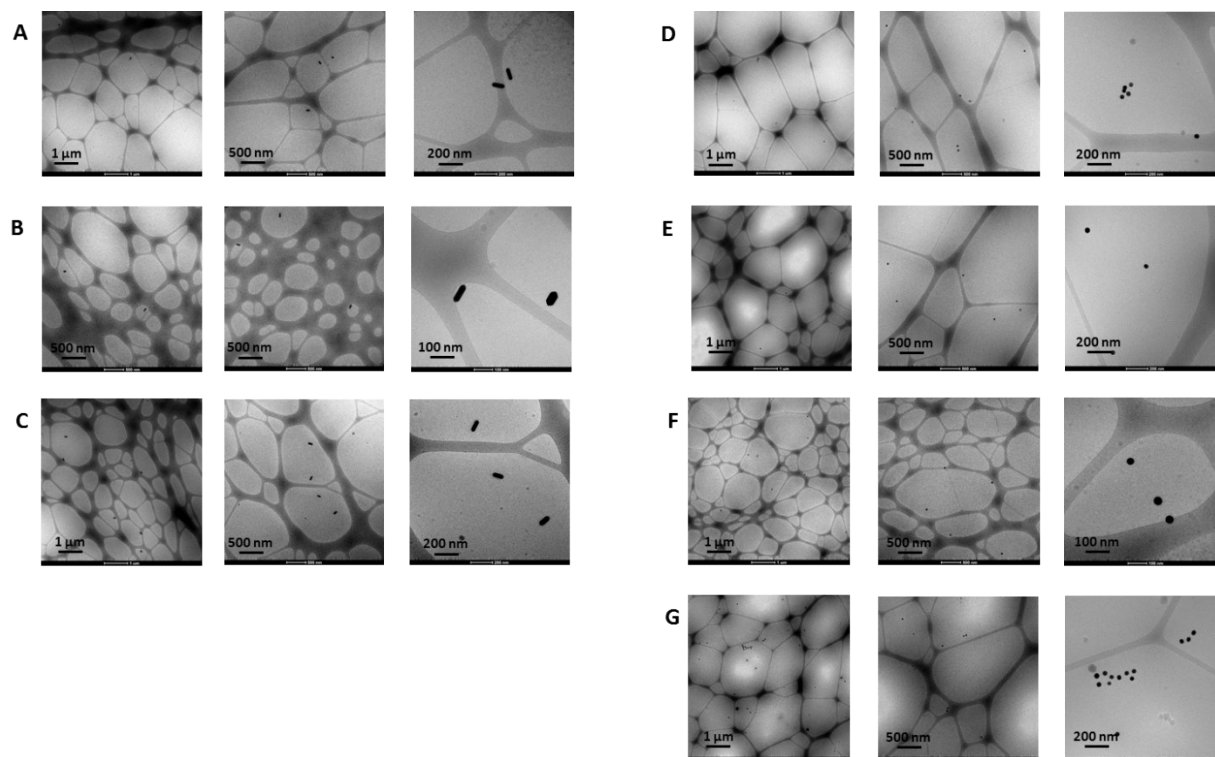

**Figure S2:** Selected Cryo TEM images of rod shaped (A-C) or spherical (D-G) gold nanoparticles. Shown are rod particles after (A) 4 hour incubation in fresh medium, concentration 12.5 μg/ml, (B) 1 hour in medium, 25 μg/ml (C) 4 hour in medium, 50 μg/ml; and spherical particles after (D) 4 hour in medium, 12.5 μg/ml (left) or 25 μg/ml (middle and right), (E) 1 hour in media, 25 μg/ml, (F) 1 hour in media, 50 μg/ml and (G) 4 hour in media, 50 μg/ml.

**Movie S1:** 3D representation of confocal images of HaCat cells after 24 hr incubation with the particles.
